# Supplementary material
Source: PubMed Central journal article supplement (PMC1187994)
Supplement: pnas_0504932102_3.pdf [file pnas_0504932102_3.pdf]

| $\Delta t$ (light)    | 1 ns | 4 ns | 10 ns | 35 ns | 100 ns | 290 ns | 800 ns | 2 $\mu$ s | 5 $\mu$ s | 10 $\mu$ s | 24 $\mu$ s | 50 $\mu$ s | 110 $\mu$ s | 250 $\mu$ s | 650 $\mu$ s | 1.3 ms | 6 ms | 35ms | 210 ms | 4 s* |     |
|-----------------------|------|------|-------|-------|--------|--------|--------|-----------|-----------|------------|------------|------------|-------------|-------------|-------------|--------|------|------|--------|------|-----|
| mode <sup>†</sup>     |      |      |       |       |        |        |        |           |           |            |            |            |             |             |             |        |      |      |        |      |     |
| Program <sup>  </sup> | P/E  | P/E  | P/E   | P/E   | P/E    | P/E    | LV     | P/E       | LV        | LV         | P/E        | P/E        | P/E         | P/E         | P/E         | P/E    | P/E  | P/E  | P/E    | P/E  | P/E |

All data were collected at the BioCARS Laue 14-ID-B beamline, Advanced Photon Source.

\*Control to check for irreversible pumping effects: negative time delay (x-ray flash 1 ms before the laser flash, 4 s waiting time between exposures  $\Rightarrow$  equivalent to a 4-s time point).

<sup>†</sup>IP, Mar345 imaging plate; CCD, MarCCD.

<sup>‡</sup>Result of merging of redundant measurements and symmetry equivalents:  $R_{\text{merge}} = \frac{\sum_{hkl,i} |A_{hkl,i} - \langle A_{hkl} \rangle|}{\sum_{hkl,i} A_{hkl,i}}$ , where  $A_{hkl}$  refers either to amplitudes,  $|F_{hkl}|$ , or intensities,  $|F_{hkl}|^2$ .

<sup>§</sup>Result of scaling the light to the dark data set.  $R_{\text{scale}} = \frac{\sum_{hkl} |I_{hkl}^{\text{light}} - I_{hkl}^{\text{dark}}|}{\sum_{hkl} I_{hkl}^{\text{light}}}$ .

<sup>¶</sup>S: Hybrid mode, single bunch. X-ray exposure per image: 74  $\times$  150 ps x-ray pulses for dark, 45  $\times$  150 ps for light (5 mA/pulse, chopper at 905 Hz); SU, hybrid mode, super-pulse, x-ray exposure per image: 20  $\times$  500 ns X-ray pulses for dark, 15  $\times$  500 ns for light (95 mA/pulse, chopper at 905 Hz); NF, normal operation mode (324 bunches): 24  $\times$  2  $\mu$ s X-ray pulses for dark, 16  $\times$  2  $\mu$ s for light (54 mA/pulse, chopper at 905 Hz); N, normal operation mode (324 bunches): 10  $\times$  5  $\mu$ s X-ray pulses for dark, 12  $\times$  5  $\mu$ s for light (136 mA/pulse, chopper at 330 Hz).

<sup>||</sup>Data reduction programs. P/E, PRECOGNITION/EPINORM; LV, LAUEVIEW.
