# Supplementary material
Source: PubMed Central journal article supplement (PMC1187994)

1 ns

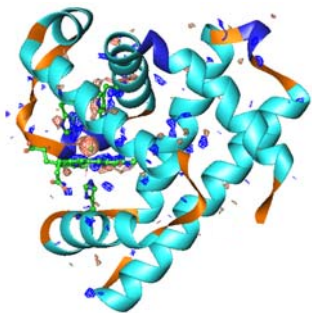

4 ns

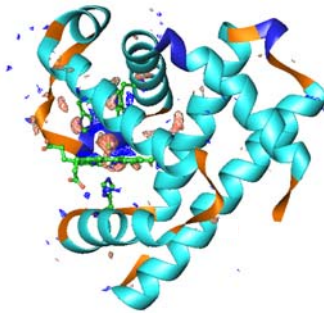

10 ns

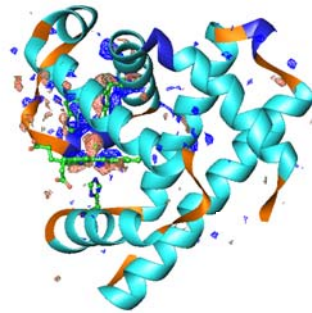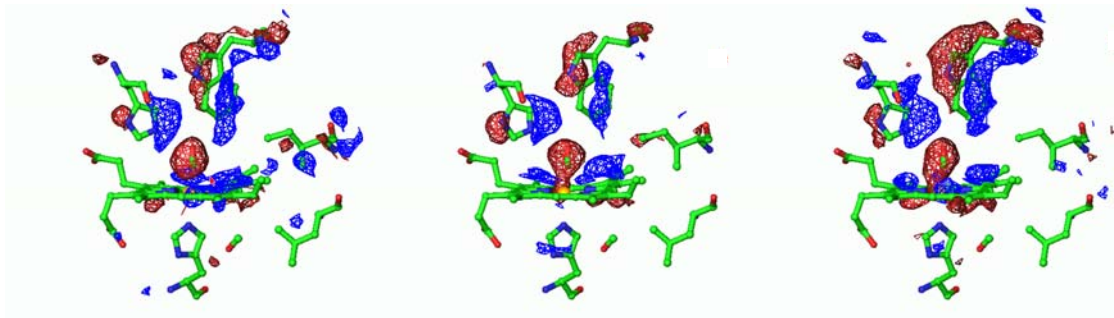

35 ns

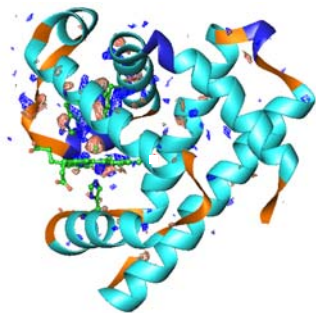

100 ns

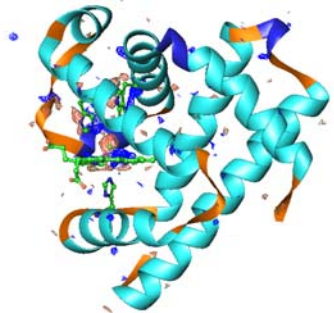

290 ns

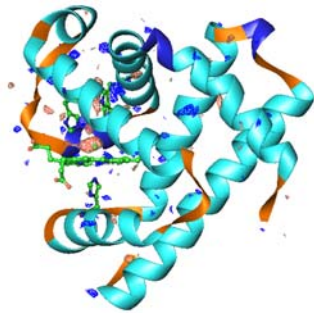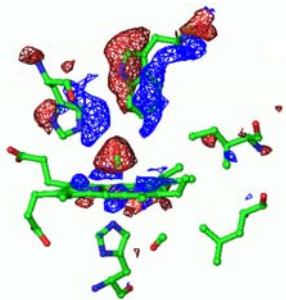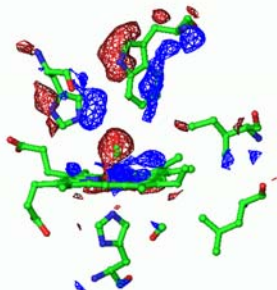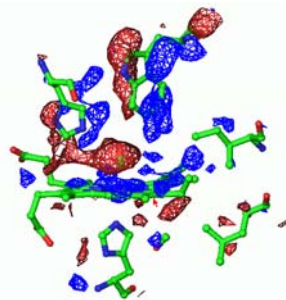

800 ns

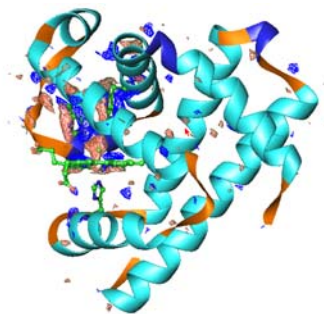

2  $\mu$ s

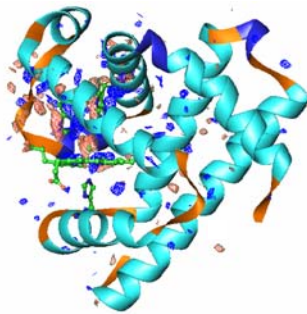

5  $\mu$ s

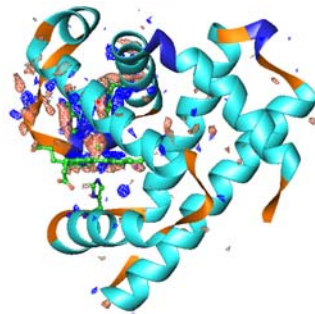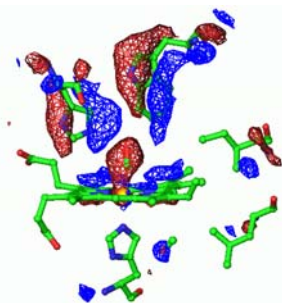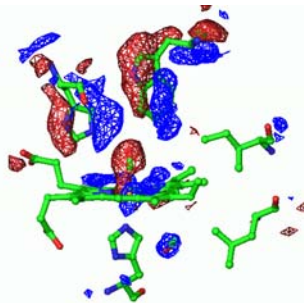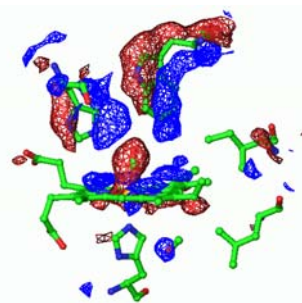

10  $\mu$ s

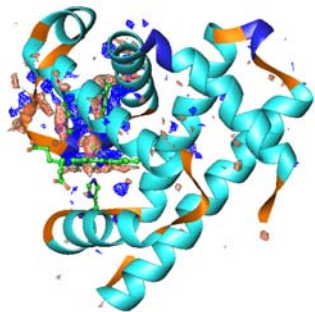

24  $\mu$ s

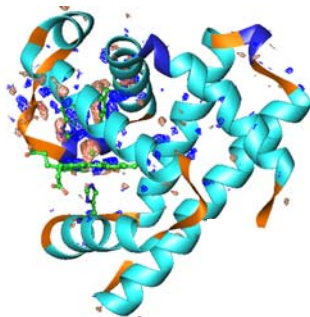

50  $\mu$ s

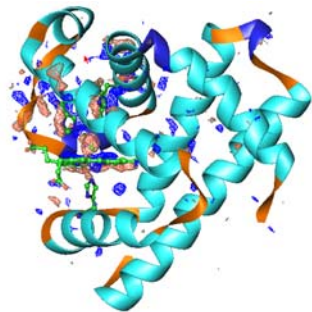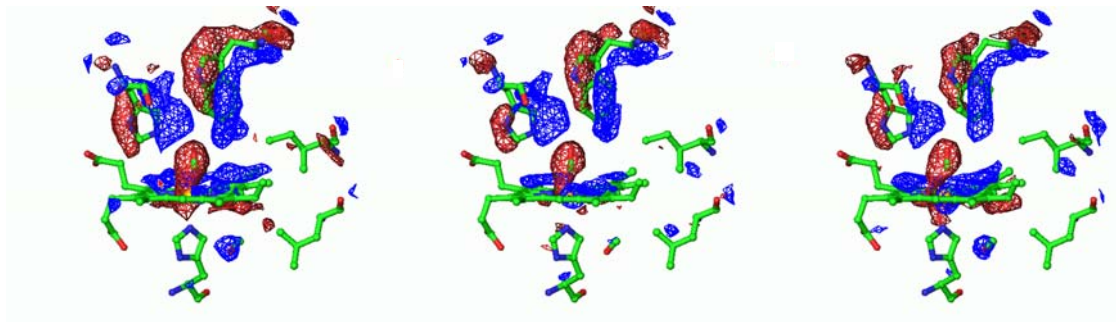

110  $\mu$ s

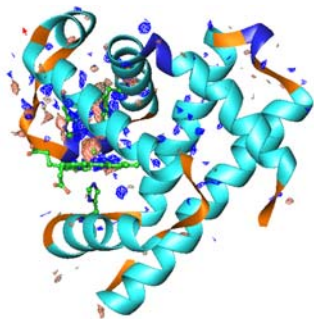

250  $\mu$ s

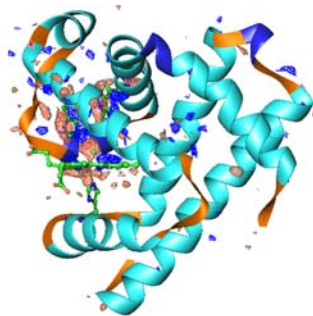

650  $\mu$ s

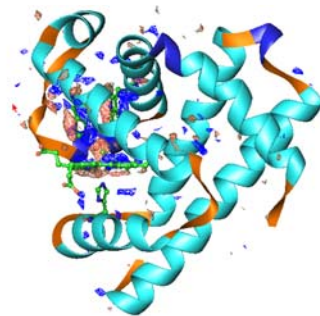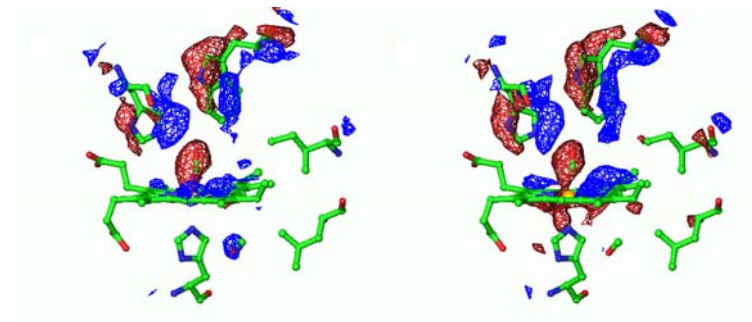

1.3 ms

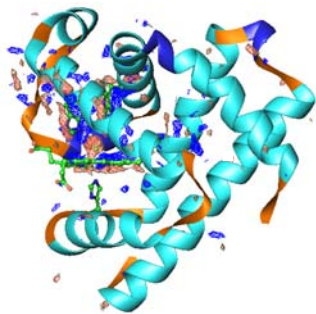

6 ms

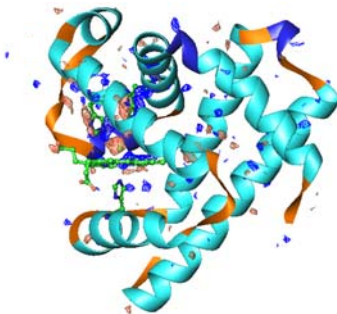

35 ms

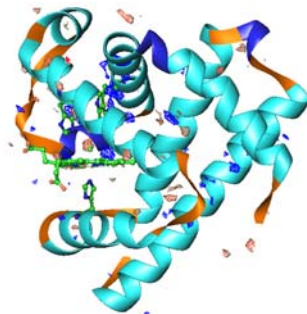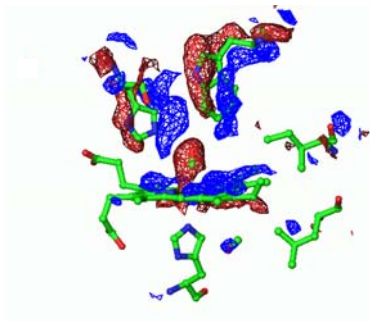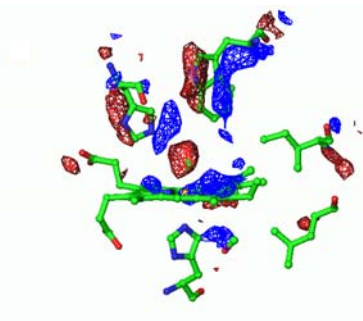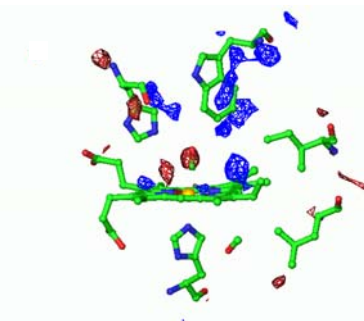

210 ms

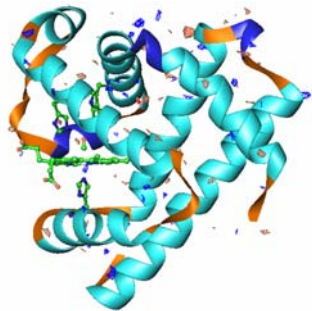

4 s

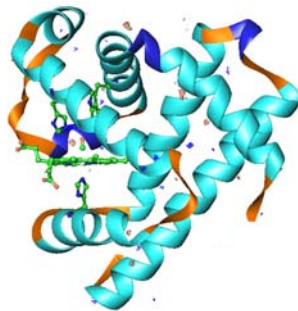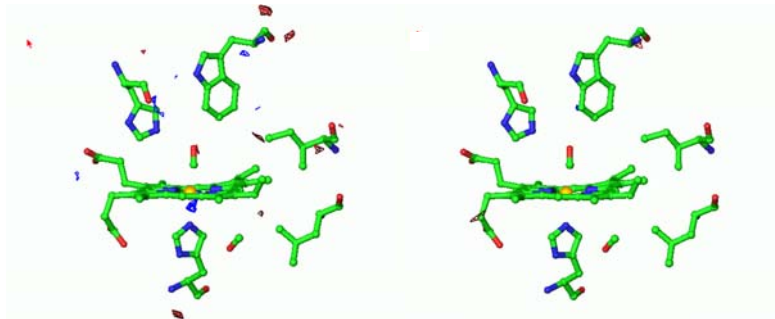

Supplement: pnas_0504932102_1.pdf [file pnas_0504932102_1.pdf]

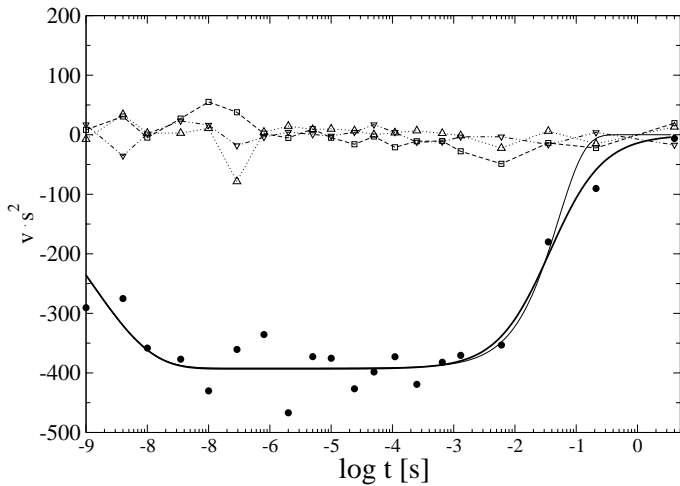

Supplement: pnas_0504932102_2.pdf [file pnas_0504932102_2.pdf]
